# Supplementary material
Source: PubMed Central journal article supplement (PMC7206606)

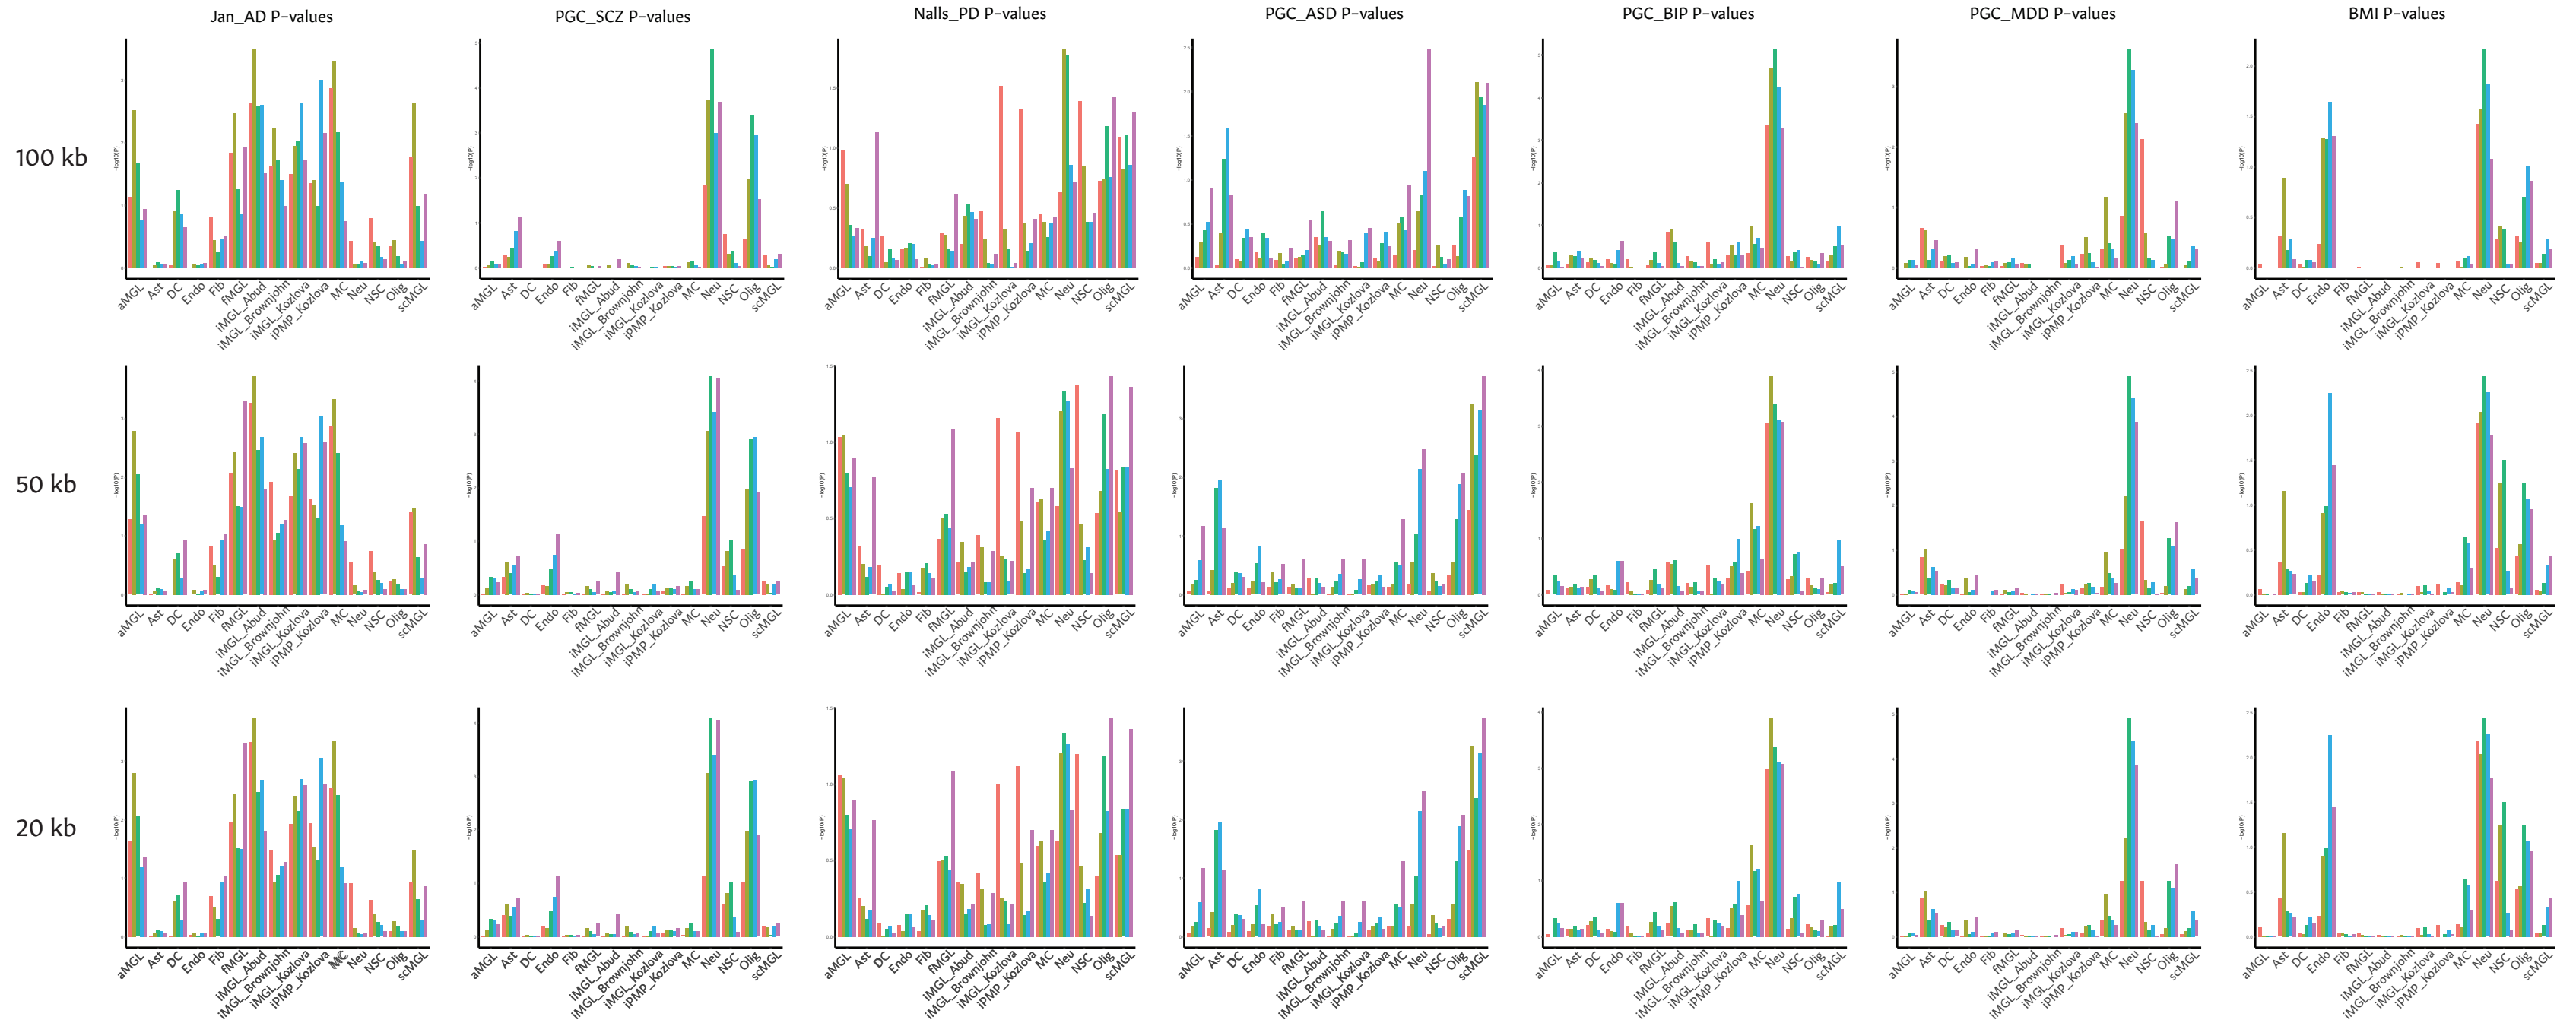

**Supplementary Figure 2. Extended LDSC GWAS enrichment for different thresholds of gene specificity.** Cell type specific enrichment runs for each GWAS trait: Alzheimer’s disease (AD; Jansen et al., 2019), Schizophrenia (SZ; PGC SCZ2, 2014), Parkinson’s disease (PD; Nalls et al., 2019), autism spectrum disorder (ASD; Grove et al., 2019), bipolar disorder (BIP; Stahl et al., 2018), major depressive disorder (MDD; Wray et al., 2018), and body mass index (BMI; Yengo et al., 2018) across multiple cell types. Colors represent the top percentile of genes, by specificity, included in the logistic regression. (Upper Row) LDSC run using the default 100kb gene window for heritability partitioning, (Middle Row) using a 50kb gene window, and (Bottom Row) using a 20kb gene window. aMGL – adult microglia, Ast – astrocytes, DC – dendritic cell, Endo – neural endothelial cells. fMGL – fetal microglia, iPMP – hi-PSC derived primitive macrophage precursor, Fib – fibroblast, MC – monocyte, Neu – neurons, NPC – neural progenitor cell, Olig – oligodendrocytes, scMGL – single-cell microglia.

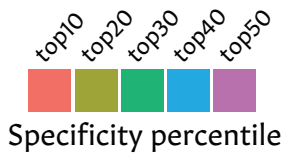

Supplement: mnp-0005-0085-s03.pdf [file mnp-0005-0085-s03.pdf]
